# Supplementary material for: Experimental and Clinical Evidence Suggests That Treatment with Betacellulin Can Alleviate Th2-Type Cytokine-Mediated Impairment of Skin Barrier Function
Source: MDPI journal article supplement (doi:10.3390/ijms231911520), 2022-09-29
Supplement: s1 [file s1]

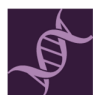

Supplementary material

# Experimental and Clinical Evidence Suggests That Treatment with Betacellulin Can Alleviate Th2-Type Cytokine-Mediated Impairment of Skin Barrier Function

Ge Peng <sup>1,2</sup>, Saya Tsukamoto <sup>1,2</sup>, Yoshie Umehara <sup>1</sup>, Ryoma Kishi <sup>3,4</sup>, Mitsutoshi Tominaga <sup>3</sup>, Kenji Takamori <sup>3</sup>, Ko Okumura <sup>2</sup>, Hideoki Ogawa <sup>2</sup>, Shigaku Ikeda <sup>1,2</sup> and François Niyonsaba <sup>2,5,\*</sup>

<sup>1</sup> Department of Dermatology and Allergology, Juntendo University Graduate School of Medicine, Tokyo 1138421, Japan

<sup>2</sup> Atopy (Allergy) Research Center, Juntendo University Graduate School of Medicine, Tokyo 1138421, Japan

<sup>3</sup> Juntendo Itch Research Center (JIRC), Institute for Environmental and Gender-Specific Medicine, Juntendo University Graduate School of Medicine, Chiba 2790021, Japan

<sup>4</sup> Department of Dermatology, Juntendo University Urayasu Hospital, Chiba 2790021, Japan

<sup>5</sup> Faculty of International Liberal Arts, Juntendo University, Tokyo 1138421, Japan

\* Correspondence: francois@juntendo.ac.jp

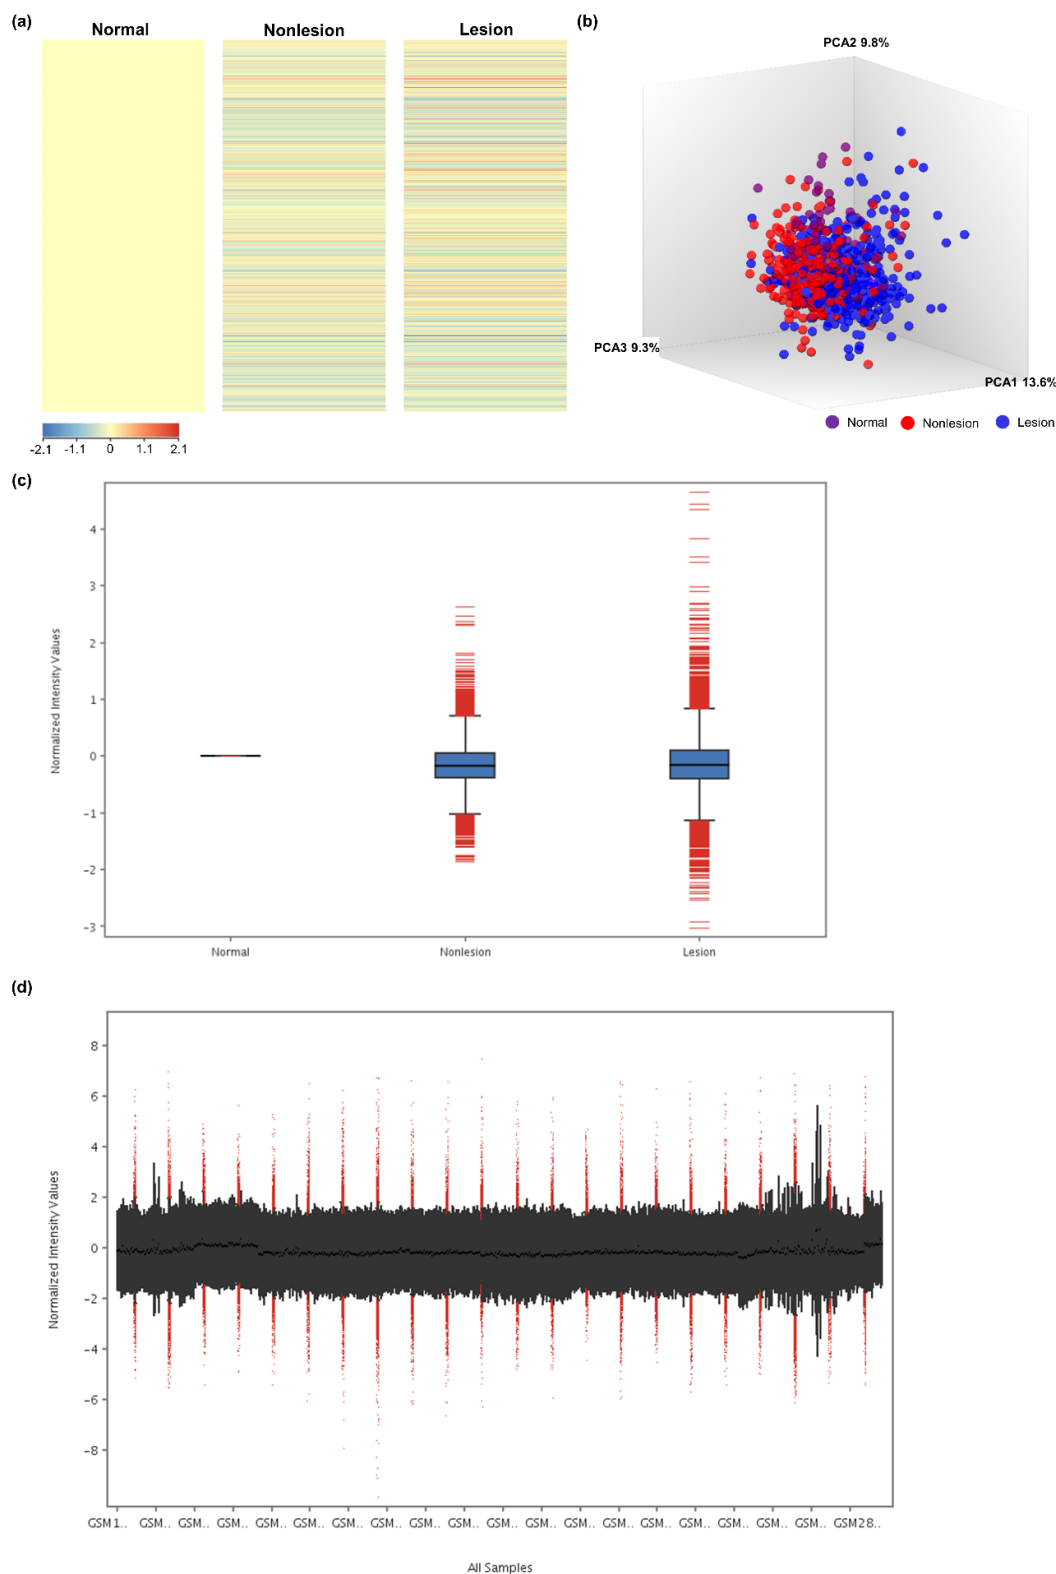

**Supplementary Figure S1. Quality plots and comparison plots.** (a) Clustering of the data with the grouping setting data normalized to the mean of the normal group. (b) Similarity plots obtained by principal component analysis (PCA). (c) Mean-SD-plot of normalized data with the group setting. (d) Boxplots of normalized and transformed signal log-ratios of all samples.

**Supplementary Table S1 Top 10 differential expressed genes identified in this study**

| Symbol        | Description                                               | Fold Change | P-value  | FDR P-value |
|---------------|-----------------------------------------------------------|-------------|----------|-------------|
| Downregulated |                                                           |             |          |             |
| BTC           | betacellulin                                              | -5.17       | 1.40E-45 | 1.40E-45    |
| HSD11B1       | hydroxysteroid (11-beta) dehydrogenase 1                  | -3.18       | 7.31E-40 | 2.66E-36    |
| RAB3B         | RAB3B, member RAS oncogene family                         | -3.07       | 3.22E-44 | 2.92E-40    |
| IL37          | interleukin 37                                            | -3          | 1.22E-27 | 3.64E-25    |
| WIF1          | WNT inhibitory factor 1                                   | -2.69       | 2.51E-27 | 6.78E-25    |
| Upregulated   |                                                           |             |          |             |
| MMP12         | matrix metalloproteinase 12                               | 5.27        | 2.07E-28 | 7.19E-26    |
| DEFB4A        | defensin, beta 4A                                         | 5.44        | 5.05E-27 | 1.27E-24    |
| S100A9        | S100 calcium-binding protein A9                           | 5.7         | 1.14E-37 | 2.49E-34    |
| S100A7A       | S100 calcium-binding protein A7A                          | 6.59        | 2.83E-31 | 1.70E-28    |
| SERPINE1      | serpin peptidase inhibitor, clade B (ovalbumin), member 4 | 10.78       | 2.62E-37 | 5.38E-34    |

**Supplementary Table S2. Characteristics of the microarray datasets included in this study.**

| GEO<br>accession | Samples     |           |      |        |      | Year | Treatments          | Platform                                                                        | Ref<br>. |
|------------------|-------------|-----------|------|--------|------|------|---------------------|---------------------------------------------------------------------------------|----------|
|                  | Normal<br>1 | Nonlesion |      | Lesion |      |      |                     |                                                                                 |          |
|                  |             | Pre       | Post | Pre    | Post |      |                     |                                                                                 |          |
| GSE59294         | -           | 7         | 5    | 16     | 12   | 2014 | Dupilumab           | GPL570<br>(HG-U133_Plus_2)<br>Affymetrix Human<br>Genome U133 Plus<br>2.0 Array | [1]      |
| GSE32924         | 8           | -         | -    | 12     | -    | 2011 | -                   | GPL570<br>(HG-U133_Plus_2)<br>Affymetrix Human<br>Genome U133 Plus<br>2.0 Array | [2]      |
| GSE36842         | -           | 8         | -    | 16     | -    | 2012 | -                   | GPL570<br>(HG-U133_Plus_2)<br>Affymetrix Human<br>Genome U133 Plus<br>2.0 Array | [3]      |
| GSE27887         | -           | 8         | 9    | 9      | 9    | 2011 | Narrow-<br>band UVB | GPL570<br>(HG-U133_Plus_2)<br>Affymetrix Human<br>Genome U133 Plus<br>2.0 Array | [4]      |
| GSE58558         | -           | 20        | 37   | 15     | 27   | 2014 | Cyclosporine        | GPL570<br>(HG-U133_Plus_2)<br>Affymetrix Human<br>Genome U133 Plus<br>2.0 Array | [5]      |
| GSE95759         | -           | 8         | -    | 14     | -    | 2018 | -                   | GPL570<br>(HG-U133_Plus_2)<br>Affymetrix Human<br>Genome U133 Plus<br>2.0 Array | [6]      |
| GSE99802         | -           | 53        | 88   | 59     | 102  | 2018 | Fezakinumab         | GPL570<br>(HG-U133_Plus_2)<br>Affymetrix Human<br>Genome U133 Plus<br>2.0 Array | [7]      |

|           |    |    |   |    |   |      |   |                                                                                 |     |
|-----------|----|----|---|----|---|------|---|---------------------------------------------------------------------------------|-----|
| GSE107361 | 29 | 40 | - | 39 | - | 2018 | - | GPL570<br>(HG-U133_Plus_2)<br>Affymetrix Human<br>Genome U133 Plus<br>2.0 Array | [8] |
|-----------|----|----|---|----|---|------|---|---------------------------------------------------------------------------------|-----|

(Continued)

[illegible]

**Supplementary Table S3. Primer sequences used for real-time PCR**

| Primer name          | Primer sequence (5'- to -3') |
|----------------------|------------------------------|
| <b><i>hRPS18</i></b> |                              |
| <i>F</i>             | TTTGCGAGTACTCAACACCAACATC    |
| <i>R</i>             | GAGCATATCTTCGGCCCACAC        |
| <b><i>BTC</i></b>    |                              |
| <i>F</i>             | CCTCTTCGGAAACGTCGTAAA        |
| <i>R</i>             | AGCTTGCCACCACCTGGA           |
| <b><i>CLDN1</i></b>  |                              |
| <i>F</i>             | GGGCAGATCCAGTGCAAAG          |
| <i>R</i>             | GGATGCCAACCACCATCAAG         |
| <b><i>TJP1</i></b>   |                              |
| <i>F</i>             | GACCAATAGCTGATGTTGCCAGAG     |
| <i>R</i>             | TGCAGGCGAATAATGCCAGA         |
| <b><i>FLG</i></b>    |                              |
| <i>F</i>             | GGAATTTCTGGCAAATCCTG         |
| <i>R</i>             | GCTTGAGCCAACTTGAATACCA       |
| <b><i>LOR</i></b>    |                              |
| <i>F</i>             | GGCTGCATCTAGTTCTGCTGTTTA     |
| <i>R</i>             | CAAATTTATTGACTGAGGCACTGG     |

**Supplementary Table S4. List of antibodies used in this study**

| Primary antibodies                           |             |          |                         |
|----------------------------------------------|-------------|----------|-------------------------|
| Antibodies                                   | Catalog No. | Dilution | Company                 |
| Claudin-1                                    | 374900      | 1:100    | Invitrogen, Waltham, MA |
| ZO-1                                         | 339100      | 1:100    | Invitrogen, Waltham, MA |
| Filaggrin                                    | ab24584     | 1:1000   | Abcam, Waltham, MA      |
| Loricrin                                     | ab85679     | 1:1000   | Abcam, Waltham, MA      |
| Secondary antibodies                         |             |          |                         |
| Sheep anti-rabbit antibody conjugated to HRP | NA934V      | 1:5000   | Cytiva, Marlborough, MA |
| Sheep anti-mouse antibody conjugated to HRP  | NA931V      | 1:5000   | Cytiva, Marlborough, MA |

**Supplementary References**

1. Hamilton, J.D.; Suárez-Fariñas, M.; Dhingra, N.; Cardinale, I.; Li, X.; Kostic, A.; Ming, J.E.; Radin, A.R.; Krueger, J.G.; Graham, N.; et al. Dupilumab improves the molecular signature in skin of patients with moderate-to-severe atopic dermatitis. *J Allergy Clin Immunol* **2014**, *134*, 1293-1300, doi:10.1016/j.jaci.2014.10.013.
2. Suárez-Fariñas, M.; Tintle, S.J.; Shemer, A.; Chiricozzi, A.; Nograles, K.; Cardinale, I.; Duan, S.; Bowcock, A.M.; Krueger, J.G.; Guttman-Yassky, E. Nonlesional atopic dermatitis skin is characterized by broad terminal differentiation defects and variable immune abnormalities. *J Allergy Clin Immunol* **2011**, *127*, 954-964.e951-954, doi:10.1016/j.jaci.2010.12.1124.
3. Gittler, J.K.; Shemer, A.; Suárez-Fariñas, M.; Fuentes-Duculan, J.; Gulewicz, K.J.; Wang, C.Q.; Mitsui, H.; Cardinale, I.; de Guzman Strong, C.; Krueger, J.G.; et al. Progressive activation of T(H)2/T(H)22 cytokines and selective epidermal proteins characterizes acute and chronic atopic dermatitis. *J Allergy Clin Immunol* **2012**, *130*, 1344-1354, doi:10.1016/j.jaci.2012.07.012.
4. Tintle, S.; Shemer, A.; Suárez-Fariñas, M.; Fujita, H.; Gilleaudeau, P.; Sullivan-Whalen, M.; Johnson-Huang, L.; Chiricozzi, A.; Cardinale, I.; Duan, S.; et al. Reversal of atopic dermatitis with narrow-band UVB phototherapy and biomarkers for therapeutic response. *J Allergy Clin Immunol* **2011**, *128*, 583-593.e581-584, doi:10.1016/j.jaci.2011.05.042.
5. Khattri, S.; Shemer, A.; Rozenblit, M.; Dhingra, N.; Czarnowicki, T.; Finney, R.; Gilleaudeau, P.; Sullivan-Whalen, M.; Zheng, X.; Xu, H.; et al. Cyclosporine in patients with atopic dermatitis modulates activated inflammatory pathways and reverses epidermal pathology. *J Allergy Clin Immunol* **2014**, *133*, 1626-1634, doi:10.1016/j.jaci.2014.03.003.

6. Malik, K.; Ungar, B.; Garcet, S.; Dutt, R.; Dickstein, D.; Zheng, X.; Xu, H.; Estrada, Y.D.; Suárez-Fariñas, M.; Shemer, A.; et al. Dust mite induces multiple polar T cell axes in human skin. *Clin Exp Allergy* **2017**, *47*, 1648-1660, doi:10.1111/cea.13040.
7. Brunner, P.M.; Pavel, A.B.; Khattri, S.; Leonard, A.; Malik, K.; Rose, S.; Jim On, S.; Vekaria, A.S.; Traidl-Hoffmann, C.; Singer, G.K.; et al. Baseline IL-22 expression in patients with atopic dermatitis stratifies tissue responses to fezakinumab. *J Allergy Clin Immunol* **2019**, *143*, 142-154, doi:10.1016/j.jaci.2018.07.028.
8. Brunner, P.M.; Israel, A.; Zhang, N.; Leonard, A.; Wen, H.C.; Huynh, T.; Tran, G.; Lyon, S.; Rodriguez, G.; Immaneni, S.; et al. Early-onset pediatric atopic dermatitis is characterized by T(H)2/T(H)17/T(H)22-centered inflammation and lipid alterations. *J Allergy Clin Immunol* **2018**, *141*, 2094-2106, doi:10.1016/j.jaci.2018.02.040.
9. Simpson, E.L.; Imafuku, S.; Poulin, Y.; Ungar, B.; Zhou, L.; Malik, K.; Wen, H.C.; Xu, H.; Estrada, Y.D.; Peng, X.; et al. A Phase 2 Randomized Trial of Apremilast in Patients with Atopic Dermatitis. *J Invest Dermatol* **2019**, *139*, 1063-1072, doi:10.1016/j.jid.2018.10.043.
10. Guttman-Yassky, E.; Bissonnette, R.; Ungar, B.; Suárez-Fariñas, M.; Ardeleanu, M.; Esaki, H.; Suprun, M.; Estrada, Y.; Xu, H.; Peng, X.; et al. Dupilumab progressively improves systemic and cutaneous abnormalities in patients with atopic dermatitis. *J Allergy Clin Immunol* **2019**, *143*, 155-172, doi:10.1016/j.jaci.2018.08.022.
11. Pavel, A.B.; Song, T.; Kim, H.J.; Del Duca, E.; Krueger, J.G.; Dubin, C.; Peng, X.; Xu, H.; Zhang, N.; Estrada, Y.D.; et al. Oral Janus kinase/SYK inhibition (ASN002) suppresses inflammation and improves epidermal barrier markers in patients with atopic dermatitis. *J Allergy Clin Immunol* **2019**, *144*, 1011-1024, doi:10.1016/j.jaci.2019.07.013.
12. Bissonnette, R.; Pavel, A.B.; Diaz, A.; Werth, J.L.; Zang, C.; Vranic, I.; Purohit, V.S.; Zielinski, M.A.; Vlahos, B.; Estrada, Y.D.; et al. Crisaborole and atopic dermatitis skin biomarkers: An inpatient randomized trial. *J Allergy Clin Immunol* **2019**, *144*, 1274-1289, doi:10.1016/j.jaci.2019.06.047.
13. Khattri, S.; Brunner, P.M.; Garcet, S.; Finney, R.; Cohen, S.R.; Oliva, M.; Dutt, R.; Fuentes-Duculan, J.; Zheng, X.; Li, X.; et al. Efficacy and safety of ustekinumab treatment in adults with moderate-to-severe atopic dermatitis. *Exp Dermatol* **2017**, *26*, 28-35, doi:10.1111/exd.13112.
